# Supplementary material for: Transcriptomic features of tumour-infiltrating CD4lowCD8high double positive αβ T cells in melanoma
Source: PubMed Central journal article supplement (PMC7125144; doi:10.1038/s41598-020-62664-x), 2020-04-03
Supplement: 41598_2020_62664_MOESM3_ESM.pdf [file 41598_2020_62664_MOESM3_ESM.pdf]

| TIL         | CD4                  |        | DP                   |        | CD8                  |        |
|-------------|----------------------|--------|----------------------|--------|----------------------|--------|
|             | Sort 1 and expansion | Sort 2 | Sort 1 and expansion | Sort 2 | Sort 1 and expansion | Sort 2 |
| <b>M125</b> | 95.2%                | >98%   | 81.8%                | 99.3%  | 94.1%                | >98%   |
| <b>M265</b> | 92.7%                | >98%   | 73.4%                | 98.1%  | 94.3%                | >98%   |
| <b>M288</b> | 96.7%                | >98%   | 87.9%                | >98%   | 97.5%                | np     |
| <b>M291</b> | 99.7%                | np     | 95.8%                | >98%   | 98.7%                | np     |
| <b>M298</b> | 97.6%                | np     | 90.1%                | >98%   | 95.0%                | np     |
| <b>M305</b> | 98.6%                | np     | 95.4%                | >98%   | 96.0%                | np     |
| <b>M314</b> | 97.5%                | >98%   | 52.3%                | 98.5%  | 96.3%                | >98%   |
| <b>M329</b> | 98.6%                | np     | 72.2%                | 99.1%  | 96.6%                | >98%   |

np: second cell sorting not performed.
