# Supplementary material for: Transcriptomic features of tumour-infiltrating CD4lowCD8high double positive αβ T cells in melanoma
Source: PubMed Central journal article supplement (PMC7125144; doi:10.1038/s41598-020-62664-x), 2020-04-03
Supplement: 41598_2020_62664_MOESM4_ESM.pdf [file 41598_2020_62664_MOESM4_ESM.pdf]

| Probe        | ILMN_GENE | mean expression in DP | mean expression in CD4 |
|--------------|-----------|-----------------------|------------------------|
| ILMN_1717466 | ABCC3     | 122.0836625           | 131.7303125            |
| ILMN_1765779 | ADAM17    | 192.6054625           | 412.3135375            |
| ILMN_2121068 | ADAM17    | 493.46195             | 167.40635              |
| ILMN_2319326 | ADARB1    | 280.3200375           | 192.4457375            |
| ILMN_1657442 | ADARB1    | 242.670075            | 229.044425             |
| ILMN_1742073 | ADCY1     | 115.036275            | 127.5874375            |
| ILMN_1690352 | ADO       | 2918.596375           | 2169.35375             |
| ILMN_1703946 | ADORA2B   | 494.462075            | 330.314275             |
| ILMN_2162799 | AHR       | 377.771775            | 302.0660125            |
| ILMN_1783818 | AKAP11    | 138.3587125           | 153.5316625            |
| ILMN_2293758 | AKAP11    | 1000.02265            | 1215.644825            |
| ILMN_1675507 | AKAP2     | 119.434525            | 130.259925             |
| ILMN_2401641 | ALDH3A2   | 147.2764875           | 175.811825             |
| ILMN_1806845 | ALG3      | 352.0554625           | 279.4771875            |
| ILMN_1684694 | ANK1      | 127.0866125           | 170.3234875            |
| ILMN_1779882 | ANKRD43   | 191.341525            | 155.0648125            |
| ILMN_2232478 | APOBEC3G  | 4994.73725            | 3273.619375            |
| ILMN_1777483 | APOOL     | 165.3081625           | 186.0063625            |
| ILMN_1808999 | ARHGEF19  | 271.7030625           | 229.777875             |
| ILMN_1703477 | ARHGEF2   | 5371.471875           | 4542.0955              |
| ILMN_1741156 | ARMCX5    | 132.0181              | 169.6418375            |
| ILMN_1654385 | ASB13     | 111.0483375           | 121.8038125            |
| ILMN_1728055 | ASTL      | 113.5932875           | 121.4668               |
| ILMN_1799889 | ATP6V0D2  | 134.4231875           | 123.7101125            |
| ILMN_2089073 | ATP9A     | 193.7456375           | 386.238875             |
| ILMN_2354334 | ATXN2L    | 171.7579625           | 152.811625             |
| ILMN_1664177 | ATXN7L2   | 340.03185             | 271.314975             |
| ILMN_1712159 | AVPR1A    | 110.823025            | 104.61395125           |
| ILMN_1724480 | AXIN2     | 126.0962875           | 149.668075             |
| ILMN_1656682 | AZIN1     | 1389.328625           | 1723.684               |
| ILMN_1711102 | B3GNT2    | 285.5387625           | 225.8277625            |
| ILMN_1753755 | B4GALT2   | 182.5559875           | 160.5102625            |
| ILMN_1699727 | BAIAP2    | 142.1661125           | 131.7139               |
| ILMN_2258749 | BAIAP2    | 148.8311125           | 129.0781125            |
| ILMN_1742410 | BCL2L1    | 1431.8158375          | 1076.3801875           |
| ILMN_1766541 | BCL2L11   | 318.1171              | 411.1526875            |
| ILMN_2359627 | BCL2L11   | 625.5322125           | 236.926525             |
| ILMN_1776181 | BIRC3     | 13885.431625          | 11658.94075            |
| ILMN_2099528 | BTLA      | 142.80445             | 207.613625             |
| ILMN_1778536 | BTLA      | 155.4807625           | 246.2945125            |
| ILMN_2205963 | C10ORF54  | 1559.3235             | 1198.6556              |
| ILMN_1719577 | C10ORF67  | 113.0146125           | 123.4486875            |
| ILMN_2394193 | C14ORF138 | 881.475475            | 634.2763375            |
| ILMN_1781102 | C14ORF138 | 682.52475             | 502.8644875            |
| ILMN_1687821 | C16ORF45  | 131.8872              | 151.139025             |

|              |           |              |              |
|--------------|-----------|--------------|--------------|
| ILMN_1737005 | C19ORF61  | 322.4551625  | 277.09785    |
| ILMN_1681741 | C1ORF31   | 294.3587125  | 353.7379     |
| ILMN_1742611 | C1ORF52   | 850.069225   | 739.8390875  |
| ILMN_1764503 | C21ORF124 | 158.360275   | 143.7822875  |
| ILMN_1690703 | C21ORF34  | 115.46895    | 123.5114125  |
| ILMN_1716682 | C21ORF88  | 117.3126875  | 110.945475   |
| ILMN_2182148 | C2ORF32   | 138.31225    | 124.5262125  |
| ILMN_1760352 | C2ORF52   | 114.1557125  | 123.002725   |
| ILMN_1815682 | C3ORF37   | 1426.420375  | 1124.9987    |
| ILMN_1698677 | C4ORF27   | 230.6682875  | 287.3087125  |
| ILMN_1725276 | C4ORF7    | 103.29797875 | 113.1434125  |
| ILMN_3248773 | C7ORF40   | 4159.405875  | 3304.23525   |
| ILMN_1779735 | C7ORF59   | 1235.8656125 | 1550.430125  |
| ILMN_2082699 | C8ORFK36  | 115.8299     | 127.6872875  |
| ILMN_1780460 | C9ORF41   | 130.4335375  | 145.162875   |
| ILMN_2398815 | CABP2     | 123.3663875  | 115.199825   |
| ILMN_2362974 | CASP7     | 225.6168625  | 476.9458     |
| ILMN_2373763 | CASP7     | 614.0538     | 190.3146625  |
| ILMN_1785156 | CASRL1    | 113.772025   | 122.298025   |
| ILMN_1678061 | CASS4     | 248.3291625  | 181.170325   |
| ILMN_1655191 | CASZ1     | 562.0506125  | 394.8632375  |
| ILMN_2302118 | CCDC50    | 1624.9198375 | 171.32075    |
| ILMN_1738333 | CCDC50    | 146.973925   | 2920.10875   |
| ILMN_1781769 | CCRL1     | 112.4527375  | 121.727375   |
| ILMN_2377669 | CD247     | 5826.733375  | 8455.956125  |
| ILMN_2365307 | CD276     | 131.8805375  | 178.01945    |
| ILMN_1714602 | CD86      | 338.4163625  | 692.007375   |
| ILMN_1768482 | CD8A      | 9751.2005    | 145.39785    |
| ILMN_2353732 | CD8A      | 9029.24125   | 139.215675   |
| ILMN_1760374 | CD8A      | 1804.8266875 | 117.3467125  |
| ILMN_1748601 | CD8B      | 431.5438125  | 121.181175   |
| ILMN_1696675 | CES2      | 1389.2301875 | 1162.2987375 |
| ILMN_1698144 | CFH       | 109.052025   | 117.732725   |
| ILMN_1658411 | CHD4      | 2720.273125  | 997.716      |
| ILMN_1685551 | CHD4      | 1263.092725  | 2152.8605    |
| ILMN_1677376 | CHD7      | 207.8256375  | 302.5179875  |
| ILMN_1706397 | CHMP6     | 230.3155     | 205.80875    |
| ILMN_1678493 | CHN1      | 127.90295    | 162.5643     |
| ILMN_1663092 | CITED2    | 403.25425    | 779.670775   |
| ILMN_2086612 | CMAH      | 337.625075   | 495.0551625  |
| ILMN_1704084 | CMAH      | 392.7680875  | 615.8342375  |
| ILMN_1679277 | CMTM3     | 131.8978625  | 120.5936875  |
| ILMN_1696494 | CMTM6     | 2120.25075   | 3058.721     |
| ILMN_3250201 | CNBP      | 284.8967125  | 253.24185    |
| ILMN_1666364 | COQ10A    | 443.9298875  | 364.0340625  |
| ILMN_1653708 | CORO1B    | 272.435325   | 749.68975    |

|              |                |              |              |
|--------------|----------------|--------------|--------------|
| ILMN_3195213 | CRCP           | 135.594375   | 124.6598     |
| ILMN_1680624 | CREG1          | 397.8826875  | 766.767025   |
| ILMN_2146418 | CRIM1          | 226.05365    | 149.219275   |
| ILMN_1796247 | CRTAM          | 835.9947125  | 167.6586625  |
| ILMN_1782788 | CSDA           | 2558.2949375 | 1515.9996625 |
| ILMN_2376455 | CSF2RA         | 108.70501    | 116.7641125  |
| ILMN_1725090 | CTHRC1         | 129.6518     | 142.4555     |
| ILMN_1651752 | CXORF21        | 128.8182125  | 150.0818625  |
| ILMN_1670925 | CYB5D1         | 568.099825   | 429.3799375  |
| ILMN_1704985 | CYP27A1        | 140.0972125  | 125.0188375  |
| ILMN_1744458 | CYP2W1         | 116.081875   | 108.764525   |
| ILMN_2173291 | CYP4B1         | 176.569725   | 261.2261     |
| ILMN_3255061 | CYTSB          | 121.6130125  | 113.532475   |
| ILMN_1658123 | DAZ2           | 116.0463625  | 124.7513     |
| ILMN_2174127 | DCBLD2         | 126.5826625  | 185.1619375  |
| ILMN_1665455 | DCUN1D3        | 880.824675   | 1167.385825  |
| ILMN_1679405 | DDX56          | 1439.130875  | 1263.6785125 |
| ILMN_1742276 | DKFZP564O0523  | 249.6219875  | 220.017275   |
| ILMN_1669972 | DKFZP686O24166 | 192.4335125  | 159.744475   |
| ILMN_1676128 | DNMT3A         | 288.9854375  | 229.9106625  |
| ILMN_1763162 | DPH2           | 252.5981     | 222.5519     |
| ILMN_1679262 | DPYSL3         | 109.77395    | 118.35125    |
| ILMN_3251672 | DSG2           | 131.659025   | 156.8512     |
| ILMN_2238302 | DST            | 121.103575   | 113.3426     |
| ILMN_1730765 | DUSP22         | 323.0078     | 251.7925875  |
| ILMN_1813275 | DUSP22         | 2119.6825    | 1676.247125  |
| ILMN_1671809 | DUSP22         | 805.56255    | 638.727225   |
| ILMN_2283398 | DUSP4          | 244.8520625  | 604.1105625  |
| ILMN_1808391 | DUSP4          | 849.9330875  | 182.6198625  |
| ILMN_1657278 | DVL1           | 151.63115    | 165.688925   |
| ILMN_1708798 | EAF2           | 252.7976     | 426.068525   |
| ILMN_2347917 | EED            | 836.07285    | 1090.2042    |
| ILMN_1710150 | EED            | 437.20405    | 582.1254125  |
| ILMN_1743199 | EGR2           | 7718.59325   | 5669.9035    |
| ILMN_1784320 | ELMO1          | 569.0353375  | 200.340225   |
| ILMN_1663627 | ELMO1          | 175.06545    | 1019.575825  |
| ILMN_1801616 | EMP1           | 240.8997375  | 426.6521625  |
| ILMN_1784967 | EPB41L4B       | 124.1883375  | 114.40835    |
| ILMN_1701025 | EPHX1          | 116.1343125  | 126.6900375  |
| ILMN_1709233 | F5             | 122.0112375  | 183.568125   |
| ILMN_1695711 | FAM105A        | 362.4441     | 270.0139     |
| ILMN_1790062 | FAM105B        | 722.2244125  | 561.6114125  |
| ILMN_2225608 | FAM135A        | 124.7464875  | 139.2828     |
| ILMN_1691946 | FAM173B        | 187.380025   | 213.0071125  |
| ILMN_2161285 | FAM40B         | 151.017925   | 171.8232125  |
| ILMN_3272603 | FAM60A         | 1822.559625  | 2125.057875  |

|              |           |              |              |
|--------------|-----------|--------------|--------------|
| ILMN_1735743 | FBLN7     | 113.42625    | 145.340075   |
| ILMN_1678404 | FBXO11    | 201.2946125  | 176.881125   |
| ILMN_2189869 | FCF1      | 177.1207125  | 161.4144375  |
| ILMN_1810289 | FER1L3    | 135.7501625  | 200.0892125  |
| ILMN_2381945 | FGA       | 106.50525375 | 112.9015125  |
| ILMN_1677456 | FGF4      | 109.71295    | 118.3808     |
| ILMN_1723123 | FGFR3     | 129.685825   | 118.093275   |
| ILMN_1730325 | FLAD1     | 159.473525   | 147.6159375  |
| ILMN_1791162 | FLJ31945  | 128.96205    | 117.62815    |
| ILMN_1699216 | FLJ45721  | 110.3198375  | 120.67485    |
| ILMN_1698769 | FLJ46321  | 110.3330625  | 117.7554375  |
| ILMN_2395214 | FMNL3     | 311.0326125  | 235.9427     |
| ILMN_2235975 | FXYD5     | 398.4085625  | 314.275275   |
| ILMN_1703408 | FZD3      | 126.02735    | 159.210025   |
| ILMN_1697559 | G6PD      | 397.35995    | 694.61935    |
| ILMN_2347949 | G6PD      | 997.4769     | 283.8295125  |
| ILMN_2151281 | GABARAPL1 | 679.3569     | 282.9168625  |
| ILMN_1718977 | GADD45B   | 4763.537875  | 3090.77575   |
| ILMN_1792168 | GALE      | 173.7217375  | 203.8724625  |
| ILMN_1677092 | GEM       | 426.0250875  | 249.2017875  |
| ILMN_2367883 | GEM       | 427.0227875  | 252.8424875  |
| ILMN_3306988 | GGTLC1    | 129.7343875  | 139.5924625  |
| ILMN_1806754 | GLDC      | 282.2840375  | 583.6502125  |
| ILMN_1710985 | GLIS2     | 122.6648875  | 114.957525   |
| ILMN_1680727 | GLRX2     | 327.2719625  | 424.4057875  |
| ILMN_1789457 | GNL1      | 472.7243375  | 407.908225   |
| ILMN_2192351 | GOLGA8E   | 132.6267125  | 120.4236875  |
| ILMN_1766405 | GOLM1     | 138.154425   | 164.6356375  |
| ILMN_1741224 | GPR137C   | 121.7647     | 112.24115    |
| ILMN_2122076 | GPR149    | 106.5205625  | 113.9839     |
| ILMN_1671260 | GPR177    | 111.1332375  | 122.1913625  |
| ILMN_1705210 | GRASP     | 163.2512     | 131.8402375  |
| ILMN_1693826 | HAVCR2    | 4491.687875  | 6328.018375  |
| ILMN_2121408 | HBEGF     | 864.1873     | 1380.43695   |
| ILMN_1666122 | HEG1      | 1553.2002375 | 1032.5255875 |
| ILMN_1751596 | HIVEP3    | 222.6949625  | 185.5715375  |
| ILMN_1686862 | HLX       | 138.7461375  | 177.6733125  |
| ILMN_2087646 | HLX       | 197.1848625  | 479.8011     |
| ILMN_1736894 | HNRNPA1L2 | 168.2404375  | 149.672375   |
| ILMN_2396039 | HOXC6     | 119.0271125  | 110.5328375  |
| ILMN_1715672 | HPCAL1    | 144.3755     | 123.0645875  |
| ILMN_1898662 | HS,120187 | 134.868425   | 126.364525   |
| ILMN_1882112 | HS,121525 | 499.9820375  | 330.8299125  |
| ILMN_1825443 | HS,127352 | 131.3313     | 121.5016625  |
| ILMN_1863284 | HS,130916 | 544.1257     | 688.1707625  |
| ILMN_1822990 | HS,131074 | 131.3671375  | 119.5193625  |

|              |           |              |              |
|--------------|-----------|--------------|--------------|
| ILMN_1893697 | HS,162734 | 124.289625   | 160.872275   |
| ILMN_1849907 | HS,195035 | 129.98635    | 119.52105    |
| ILMN_1898124 | HS,25892  | 3379.923375  | 2764.438     |
| ILMN_1873677 | HS,31037  | 438.4155     | 271.1116375  |
| ILMN_1867517 | HS,37648  | 160.4479125  | 259.1760625  |
| ILMN_1882512 | HS,406790 | 545.5332375  | 402.7753625  |
| ILMN_1819783 | HS,415576 | 162.0745125  | 196.228075   |
| ILMN_1828584 | HS,445843 | 244.4565375  | 190.9248125  |
| ILMN_1909784 | HS,473425 | 149.3374375  | 132.851825   |
| ILMN_1872404 | HS,478682 | 222.2434375  | 318.071975   |
| ILMN_1836218 | HS,481464 | 290.0757125  | 238.8275375  |
| ILMN_1823207 | HS,504036 | 130.926375   | 123.1048125  |
| ILMN_1836958 | HS,528873 | 190.9924125  | 160.11695    |
| ILMN_1851316 | HS,534445 | 117.1926375  | 155.6771     |
| ILMN_1914405 | HS,535454 | 113.154225   | 122.25245    |
| ILMN_1846547 | HS,540716 | 126.2266625  | 115.9258     |
| ILMN_1859931 | HS,543875 | 137.02375    | 125.3040125  |
| ILMN_1859863 | HS,555181 | 630.439725   | 445.552125   |
| ILMN_1849218 | HS,559564 | 163.5716125  | 142.284725   |
| ILMN_1885147 | HS,565650 | 129.458825   | 120.7215875  |
| ILMN_1850366 | HS,567186 | 123.7521625  | 114.7847     |
| ILMN_1895745 | HS,571967 | 115.867825   | 107.54959625 |
| ILMN_1889135 | HS,572124 | 128.867075   | 119.7501375  |
| ILMN_1917174 | HS,573799 | 125.0923375  | 138.583175   |
| ILMN_1907685 | HS,578483 | 128.3556125  | 117.9920125  |
| ILMN_1857476 | HS,578552 | 138.726      | 124.4372     |
| ILMN_1814787 | ICA1      | 140.882625   | 154.3571625  |
| ILMN_2182198 | ICT1      | 813.8803375  | 954.051      |
| ILMN_1806093 | IFRG15    | 131.268775   | 122.4219     |
| ILMN_1777449 | IFT74     | 170.0511625  | 203.8216125  |
| ILMN_1772674 | IL21      | 180.2922625  | 250.171175   |
| ILMN_1661687 | IL21R     | 169.9773625  | 151.7439125  |
| ILMN_1786609 | IL21R     | 122.949825   | 115.0122375  |
| ILMN_1667575 | IL31RA    | 121.9088     | 113.2774375  |
| ILMN_2389080 | IL4       | 182.2643125  | 150.111275   |
| ILMN_1754753 | IL6R      | 116.3788625  | 124.6967     |
| ILMN_2184373 | IL8       | 6877.677875  | 13171.241625 |
| ILMN_1666733 | IL8       | 2907.2552125 | 6724.77225   |
| ILMN_2043079 | ILDR1     | 147.1525375  | 206.1001375  |
| ILMN_1797668 | INSM1     | 146.7948875  | 176.238      |
| ILMN_1754491 | IYD       | 106.2033375  | 114.4222375  |
| ILMN_1727438 | KCND3     | 135.8968625  | 124.904225   |
| ILMN_1766918 | KCNK5     | 794.18565    | 613.9132125  |
| ILMN_1674488 | KCNN1     | 119.81295    | 111.0690125  |
| ILMN_1786326 | KCTD15    | 126.2873875  | 158.3762125  |
| ILMN_1807767 | KIAA0182  | 671.668875   | 438.7291375  |

|              |              |              |             |
|--------------|--------------|--------------|-------------|
| ILMN_1703969 | KIAA0251     | 204.84375    | 177.7330625 |
| ILMN_1796751 | KIAA1274     | 220.15865    | 180.0202375 |
| ILMN_1745813 | KIAA1279     | 307.8592125  | 379.592125  |
| ILMN_1727833 | KIF19        | 110.52415    | 121.6488    |
| ILMN_1658399 | KLRG1        | 1019.4413125 | 305.0695    |
| ILMN_1811261 | KRIT1        | 331.8022375  | 291.0076    |
| ILMN_1770228 | KRT34        | 115.042125   | 121.912     |
| ILMN_1737653 | KRT78        | 125.298725   | 116.0876    |
| ILMN_1746517 | KYNU         | 108.76610875 | 152.2180375 |
| ILMN_1737514 | KYNU         | 128.874125   | 178.6142125 |
| ILMN_1807491 | LAIR2        | 424.5693     | 636.0959875 |
| ILMN_1765212 | LARP1B       | 248.93855    | 220.043025  |
| ILMN_1767448 | LHFP         | 323.3896125  | 393.669425  |
| ILMN_1665011 | LHX3         | 111.4308875  | 121.9615    |
| ILMN_3182893 | LOC100128163 | 160.2106375  | 131.737775  |
| ILMN_3186782 | LOC100128653 | 117.0578375  | 127.8044    |
| ILMN_3258717 | LOC100128728 | 119.2176125  | 128.1048375 |
| ILMN_3256478 | LOC100129034 | 280.8823625  | 180.9763    |
| ILMN_3189463 | LOC100129054 | 113.7131875  | 122.6200875 |
| ILMN_3269108 | LOC100129058 | 110.7093625  | 117.5556375 |
| ILMN_3183346 | LOC100129466 | 111.5897125  | 120.4336125 |
| ILMN_3259185 | LOC100129630 | 144.6052125  | 132.0435625 |
| ILMN_3263585 | LOC100129916 | 117.3535     | 125.3794625 |
| ILMN_3272374 | LOC100129936 | 113.7296875  | 124.6713125 |
| ILMN_3191030 | LOC100129960 | 221.57625    | 184.0317625 |
| ILMN_3272590 | LOC100129975 | 240.1995     | 208.1249375 |
| ILMN_3244935 | LOC100130308 | 2866.891875  | 3372.706    |
| ILMN_3272243 | LOC100130798 | 123.533675   | 115.664575  |
| ILMN_3256712 | LOC100130828 | 139.3739375  | 129.0175    |
| ILMN_3176090 | LOC100130919 | 5665.67775   | 4503.216875 |
| ILMN_3201183 | LOC100131542 | 121.8019     | 114.909175  |
| ILMN_3293244 | LOC100131744 | 156.0969625  | 142.9826125 |
| ILMN_3275696 | LOC100131940 | 1470.606125  | 1876.976875 |
| ILMN_3247979 | LOC100132024 | 130.6599625  | 118.845425  |
| ILMN_3244841 | LOC100132111 | 176.7612375  | 219.0427    |
| ILMN_3235732 | LOC100133095 | 127.018375   | 113.460975  |
| ILMN_3235126 | LOC100133558 | 127.3909     | 119.0189    |
| ILMN_3246424 | LOC100133600 | 254.9133625  | 234.374875  |
| ILMN_3287952 | LOC100133800 | 294.88405    | 363.4544875 |
| ILMN_3249560 | LOC100134291 | 291.0305125  | 224.6574    |
| ILMN_1667330 | LOC113386    | 760.6516     | 657.1964    |
| ILMN_1780613 | LOC222967    | 130.2118625  | 118.1795375 |
| ILMN_3239925 | LOC25845     | 373.87895    | 314.5509125 |
| ILMN_2083137 | LOC284379    | 120.4981625  | 110.787725  |
| ILMN_1694327 | LOC285176    | 304.4042875  | 256.8753875 |
| ILMN_1806387 | LOC340598    | 118.8239875  | 127.5102625 |

|              |           |             |             |
|--------------|-----------|-------------|-------------|
| ILMN_3204890 | LOC345041 | 188.594825  | 219.4251125 |
| ILMN_1652628 | LOC375295 | 121.6544375 | 112.4079375 |
| ILMN_3240698 | LOC388279 | 136.8126375 | 123.0695    |
| ILMN_3205364 | LOC400389 | 116.2256875 | 126.3337875 |
| ILMN_1708542 | LOC402617 | 130.518225  | 117.2024    |
| ILMN_1687568 | LOC440337 | 132.3798875 | 121.319775  |
| ILMN_1706434 | LOC440359 | 546.1680875 | 357.5020875 |
| ILMN_1683250 | LOC440731 | 156.4145    | 194.336025  |
| ILMN_3237507 | LOC552889 | 844.8484875 | 737.2814875 |
| ILMN_1702620 | LOC642374 | 115.0548875 | 124.2978125 |
| ILMN_1778128 | LOC642780 | 126.654425  | 117.99575   |
| ILMN_1658495 | LOC642895 | 121.0121    | 112.6184    |
| ILMN_1756139 | LOC643310 | 623.03435   | 739.5667125 |
| ILMN_1661306 | LOC643433 | 3740.649125 | 4432.404375 |
| ILMN_1797634 | LOC643937 | 127.9826875 | 120.1303125 |
| ILMN_1737543 | LOC644005 | 110.97815   | 119.1483375 |
| ILMN_1762424 | LOC644024 | 119.9913875 | 128.584825  |
| ILMN_3202683 | LOC644587 | 109.4774125 | 118.288575  |
| ILMN_1775053 | LOC644838 | 113.7869625 | 121.60695   |
| ILMN_1653352 | LOC644975 | 109.8600875 | 117.7285125 |
| ILMN_1794617 | LOC645104 | 121.4716375 | 111.136375  |
| ILMN_1691405 | LOC645850 | 121.6853375 | 112.6184625 |
| ILMN_1756914 | LOC645871 | 124.3668    | 115.6890875 |
| ILMN_1767236 | LOC648103 | 137.8830625 | 127.055875  |
| ILMN_1815474 | LOC649470 | 113.7873375 | 121.13635   |
| ILMN_1659028 | LOC649971 | 120.3456625 | 111.607075  |
| ILMN_1683664 | LOC650369 | 3648.25325  | 4330.755375 |
| ILMN_1718094 | LOC651324 | 125.2957875 | 118.000725  |
| ILMN_1703297 | LOC652512 | 115.041     | 124.4829375 |
| ILMN_1745028 | LOC652635 | 116.3534    | 126.9705375 |
| ILMN_1693804 | LOC652675 | 467.7171375 | 355.8147875 |
| ILMN_1682518 | LOC653197 | 116.3909125 | 128.526325  |
| ILMN_1705599 | LOC653427 | 117.92915   | 130.8821875 |
| ILMN_1688294 | LOC653820 | 139.671425  | 127.0069375 |
| ILMN_1658460 | LOC653884 | 1436.64125  | 1207.8795   |
| ILMN_3274532 | LOC727997 | 120.227     | 111.8513125 |
| ILMN_1771048 | LOC728153 | 641.3562625 | 525.0454875 |
| ILMN_3298549 | LOC729251 | 121.8936125 | 110.86455   |
| ILMN_3242786 | LOC729915 | 114.04645   | 120.362225  |
| ILMN_3301168 | LOC730052 | 334.906575  | 395.3568375 |
| ILMN_1769220 | LOC730713 | 117.1116375 | 126.363325  |
| ILMN_1660323 | LOC731999 | 137.9867    | 120.1952875 |
| ILMN_1656257 | LOC732275 | 122.687125  | 112.3870375 |
| ILMN_2128795 | LRIG1     | 2793.856375 | 1939.300125 |
| ILMN_2129161 | LRR32     | 178.6030625 | 149.34515   |
| ILMN_1773650 | LRRN3     | 6356.757475 | 3266.5755   |

|              |            |              |              |
|--------------|------------|--------------|--------------|
| ILMN_2048591 | LRRN3      | 4988.5484    | 2571.79625   |
| ILMN_1723962 | LXN        | 471.2457375  | 675.4649375  |
| ILMN_1738646 | LY6K       | 114.219275   | 122.468025   |
| ILMN_2142117 | LYPLAL1    | 423.7703625  | 533.46465    |
| ILMN_1722206 | MAF        | 207.803075   | 277.6727375  |
| ILMN_2361714 | MAGEA4     | 116.4471875  | 125.8846625  |
| ILMN_1789567 | MAGED2     | 223.026875   | 170.8879125  |
| ILMN_2327860 | MAL        | 1539.434675  | 1252.176975  |
| ILMN_2320330 | MAL        | 524.6101     | 3863.609125  |
| ILMN_1724070 | MAP3K14    | 328.46615    | 267.353775   |
| ILMN_1671437 | MAP3K15    | 112.578875   | 121.2781375  |
| ILMN_2408908 | MAP4K5     | 210.4881625  | 183.0839     |
| ILMN_1669321 | MATK       | 303.9434375  | 1243.219525  |
| ILMN_2319000 | MATK       | 2201.3496875 | 210.6620125  |
| ILMN_1720595 | MDGA1      | 137.728175   | 120.88085    |
| ILMN_1815190 | METTL1     | 1350.8030875 | 1117.3912875 |
| ILMN_3240524 | MFSD6      | 1196.223125  | 992.3517     |
| ILMN_1690304 | MGC26718   | 120.9025125  | 139.950725   |
| ILMN_1862180 | MGC3032    | 224.804525   | 183.7228125  |
| ILMN_1689624 | MINA       | 264.790225   | 182.0121375  |
| ILMN_2322986 | MINA       | 161.731375   | 213.2026875  |
| ILMN_1746025 | MINA       | 184.7290625  | 335.627325   |
| ILMN_3309955 | MIR194-2   | 124.4496125  | 110.43653    |
| ILMN_3309224 | MIR23A     | 127.051425   | 119.9055875  |
| ILMN_3308265 | MIR302C    | 190.0701     | 276.193525   |
| ILMN_3311070 | MIR33B     | 116.766125   | 130.3604125  |
| ILMN_3309739 | MIRLET7D   | 170.058125   | 148.2956125  |
| ILMN_1796316 | MMP9       | 252.678125   | 174.0402625  |
| ILMN_1792910 | MNT        | 957.4453     | 728.47885    |
| ILMN_2386008 | MPZL1      | 144.7877375  | 183.6153625  |
| ILMN_1795739 | MPZL3      | 195.6412     | 159.1501125  |
| ILMN_1754860 | MRPS12     | 299.0245375  | 250.495275   |
| ILMN_1774028 | MTFR1      | 242.6448125  | 278.6319625  |
| ILMN_1772521 | MTHFD1L    | 504.1387625  | 719.292575   |
| ILMN_1652434 | MTHFD2L    | 132.5168875  | 142.8606     |
| ILMN_2110908 | MYC        | 2059.82575   | 1493.797625  |
| ILMN_2198413 | MYEOV      | 126.9943125  | 115.654225   |
| ILMN_3302919 | MYOF       | 139.8645     | 192.8229125  |
| ILMN_3244960 | NACC1      | 298.5281375  | 251.4366375  |
| ILMN_1753111 | NAMPT      | 1118.6925375 | 823.0425125  |
| ILMN_3249172 | NCRNA00092 | 314.860475   | 222.5761375  |
| ILMN_1738622 | NDNL2      | 342.5675     | 262.9673625  |
| ILMN_1695020 | NEK3       | 169.5400125  | 195.6876     |
| ILMN_1660871 | NEK6       | 258.062625   | 164.60845    |
| ILMN_1672081 | NEURL      | 115.7533     | 108.4425625  |
| ILMN_1780291 | NFAT5      | 437.2167125  | 366.3619875  |



|              |         |              |              |
|--------------|---------|--------------|--------------|
| ILMN_2049766 | NFE2L3  | 1145.7780875 | 1802.023     |
| ILMN_1694325 | NFIX    | 152.4449125  | 128.7050125  |
| ILMN_1714965 | NFKB1   | 11953.8075   | 9401.781875  |
| ILMN_2295879 | NGDN    | 200.5351     | 177.721325   |
| ILMN_1699778 | NKIRAS2 | 152.7832375  | 138.216225   |
| ILMN_1724304 | NLE1    | 172.4926875  | 157.7619375  |
| ILMN_1680435 | NPEPPS  | 166.5661875  | 145.7647125  |
| ILMN_1814221 | NPTX1   | 261.5133375  | 499.0164375  |
| ILMN_2410145 | NR4A1   | 158.034375   | 127.1072625  |
| ILMN_2408566 | NR4A1   | 170.667975   | 142.738325   |
| ILMN_1782305 | NR4A2   | 2954.1926375 | 1585.2431125 |
| ILMN_2339955 | NR4A2   | 1543.7046625 | 835.7517375  |
| ILMN_1687392 | NRK     | 155.898675   | 145.3212375  |
| ILMN_2366719 | NSFL1C  | 281.7045125  | 238.1827875  |
| ILMN_1756049 | NT5DC3  | 560.0826125  | 456.7308     |
| ILMN_2357855 | NTRK2   | 527.14225    | 848.2588375  |
| ILMN_1672606 | OAS1    | 114.7624875  | 123.0382875  |
| ILMN_1780546 | OSM     | 1919.0358625 | 3287.470975  |
| ILMN_1723141 | OTUD1   | 165.951075   | 147.392175   |
| ILMN_1752008 | OTUD1   | 129.5984125  | 272.2496     |
| ILMN_1708203 | OTUD4   | 839.6271875  | 702.7493     |
| ILMN_1716335 | P2RXL1  | 113.4564125  | 123.57095    |
| ILMN_3300313 | P4HTM   | 1115.918525  | 407.290725   |
| ILMN_2372136 | P4HTM   | 545.550575   | 833.9584625  |
| ILMN_1672122 | P4HTM   | 265.18555    | 220.9265     |
| ILMN_2324909 | PARD3B  | 130.0637375  | 119.0932     |
| ILMN_3243705 | PDXDC1  | 1403.634625  | 1182.505125  |
| ILMN_1696962 | PDZD8   | 257.4983625  | 231.601825   |
| ILMN_1690695 | PEX11A  | 121.4422125  | 134.399225   |
| ILMN_1737416 | PGBD3   | 213.3573375  | 187.6849625  |
| ILMN_1666819 | PHLDB1  | 213.1802125  | 179.077325   |
| ILMN_1789781 | PIM3    | 892.4491375  | 677.7730375  |
| ILMN_1707748 | PIM3    | 3861.314625  | 3064.3575    |
| ILMN_1736654 | PIP5K1B | 177.0581125  | 219.91065    |
| ILMN_1668514 | PIP5K1C | 1072.2138    | 503.7831125  |
| ILMN_2052891 | PKD2    | 570.0073375  | 712.632725   |
| ILMN_1738742 | PLAT    | 204.8490125  | 326.848075   |
| ILMN_3240611 | PLK5P   | 120.2158125  | 109.951025   |
| ILMN_1785265 | PLS3    | 123.506625   | 158.408375   |
| ILMN_2041788 | PLS3    | 112.07755    | 203.8545875  |
| ILMN_1764239 | PMPCA   | 1550.961     | 1232.9043125 |
| ILMN_1724081 | POTE14  | 112.84575    | 120.6813625  |
| ILMN_1811049 | POU2AF1 | 117.782625   | 161.747075   |
| ILMN_1758085 | PPIL5   | 124.7599375  | 115.3503875  |
| ILMN_2291152 | PPP2R2C | 129.377775   | 120.5705625  |
| ILMN_1670970 | PPP3CA  | 308.9588875  | 272.5481875  |

|              |          |              |              |
|--------------|----------|--------------|--------------|
| ILMN_1692429 | PQBP1    | 145.312675   | 132.2571375  |
| ILMN_1798620 | PQLC1    | 3650.196125  | 2607.084625  |
| ILMN_1740633 | PRF1     | 8197.24575   | 5053.4155    |
| ILMN_1801105 | PRKCD    | 1949.76575   | 1488.570875  |
| ILMN_2205050 | PRKX     | 850.9290625  | 645.04735    |
| ILMN_1797776 | PRSS23   | 155.6725625  | 251.682625   |
| ILMN_1693397 | PSG4     | 114.641275   | 122.1705125  |
| ILMN_1743130 | PTGFRN   | 120.7993375  | 136.09335    |
| ILMN_2077905 | PTGFRN   | 112.0158125  | 126.2876625  |
| ILMN_1737398 | PTPLAD1  | 1355.4185    | 1649.839375  |
| ILMN_2374683 | PTPN13   | 107.414705   | 152.9331     |
| ILMN_2374687 | PTPN13   | 127.0771125  | 129.8311375  |
| ILMN_1755023 | RAD50    | 584.6421125  | 446.7391     |
| ILMN_1757384 | RAN      | 1190.83565   | 949.03935    |
| ILMN_1780756 | RBM23    | 1862.44675   | 1588.687375  |
| ILMN_2316844 | RBPJ     | 300.0218875  | 664.8833375  |
| ILMN_1708537 | RBPJ     | 3074.682125  | 2180.269475  |
| ILMN_1726913 | RBPJ     | 962.5546     | 245.898075   |
| ILMN_1728218 | RBPMS    | 122.7761125  | 150.2406375  |
| ILMN_1720124 | RCC2     | 5598.571625  | 4548.37775   |
| ILMN_2337492 | RCE1     | 253.5464625  | 225.3151625  |
| ILMN_2222984 | RDH14    | 1362.1026875 | 1139.099775  |
| ILMN_2124064 | REL      | 667.371575   | 406.5054375  |
| ILMN_1766085 | REL      | 597.8773125  | 400.1663375  |
| ILMN_3247761 | REXO1L5P | 124.2092375  | 114.0973375  |
| ILMN_3250850 | RFESD    | 129.525775   | 139.6356625  |
| ILMN_2100458 | RFESD    | 168.839475   | 200.41815    |
| ILMN_1808226 | RGS16    | 1426.5430875 | 1082.6072625 |
| ILMN_1731736 | RIN3     | 300.4034875  | 149.56675    |
| ILMN_2322499 | RORA     | 169.2427875  | 260.3259375  |
| ILMN_2322498 | RORA     | 290.1640625  | 631.453175   |
| ILMN_3306270 | RPL31P10 | 126.5845125  | 138.489175   |
| ILMN_2338785 | RPS14    | 10060.268625 | 11386.003    |
| ILMN_1806294 | RPS6KA3  | 739.5304375  | 589.6896125  |
| ILMN_1781656 | SCGB1D1  | 112.6163625  | 120.7937375  |
| ILMN_2363591 | SDCBP    | 1767.809025  | 2456.017875  |
| ILMN_2363586 | SDCBP    | 3134.20325   | 1274.2947125 |
| ILMN_1803997 | SDCCAG3  | 918.4262375  | 720.3027     |
| ILMN_2380850 | SDCCAG3  | 485.5220375  | 388.963425   |
| ILMN_2391912 | SEC14L1  | 484.671225   | 273.6357     |
| ILMN_1732575 | SEC14L1  | 398.6898125  | 471.173225   |
| ILMN_2285802 | SEC14L1  | 821.1781     | 244.0695375  |
| ILMN_1742052 | SERPINB9 | 486.899275   | 385.5909125  |
| ILMN_2205935 | SFXN1    | 2907.644125  | 1877.73375   |
| ILMN_1811364 | SGPP2    | 382.273725   | 156.0188375  |
| ILMN_1812062 | SGPP2    | 136.1322     | 650.205125   |

|              |           |             |              |
|--------------|-----------|-------------|--------------|
| ILMN_1807050 | SHC4      | 273.5412625 | 394.1268     |
| ILMN_1732410 | SLC16A9   | 116.2132125 | 139.4617625  |
| ILMN_1785405 | SLC17A9   | 147.213075  | 122.328975   |
| ILMN_1711838 | SLC25A24  | 391.8149375 | 757.580225   |
| ILMN_1652465 | SLC26A4   | 138.0933375 | 221.154475   |
| ILMN_1742731 | SLC35A2   | 966.5698    | 794.211425   |
| ILMN_1814797 | SLC35F3   | 153.7380375 | 162.062625   |
| ILMN_1675873 | SLC35F3   | 129.8759875 | 259.11415    |
| ILMN_1704446 | SLC6A10P  | 175.814525  | 156.2226875  |
| ILMN_3241985 | SNORA13   | 180.7541625 | 160.3994875  |
| ILMN_3248890 | SNORA24   | 575.2912125 | 454.2154     |
| ILMN_3248811 | SNORA27   | 165.913075  | 147.658675   |
| ILMN_2096747 | SNORA33   | 383.2803625 | 317.4235     |
| ILMN_3241798 | SNORA41   | 410.8905625 | 331.4668625  |
| ILMN_1730773 | SNORA70   | 1089.344725 | 911.304275   |
| ILMN_3244154 | SNORA84   | 193.537475  | 168.1515875  |
| ILMN_1673181 | SNORD100  | 319.6757875 | 269.4255875  |
| ILMN_1799381 | SNORD14A  | 363.7462875 | 300.3156125  |
| ILMN_1707598 | SNORD14B  | 196.158225  | 169.189425   |
| ILMN_2072391 | SNORD31   | 540.7654125 | 421.9191375  |
| ILMN_1667288 | SNORD73A  | 178.7578875 | 161.4384625  |
| ILMN_3248703 | SNORD99   | 319.213025  | 248.359      |
| ILMN_1685327 | SON       | 183.4407375 | 163.2802     |
| ILMN_1734645 | SPAG4L    | 125.99125   | 114.301775   |
| ILMN_1691860 | SPRY1     | 1926.317675 | 1494.1661    |
| ILMN_2341254 | STARD13   | 107.8647025 | 119.3140875  |
| ILMN_1750912 | STXBP6    | 164.5014    | 185.24375    |
| ILMN_2335072 | TAF1C     | 230.0864625 | 205.6697375  |
| ILMN_1676408 | TAGAP     | 398.4108125 | 446.5605     |
| ILMN_2333774 | TAGAP     | 720.3453875 | 391.4004125  |
| ILMN_1739985 | TAGAP     | 823.30565   | 241.4256125  |
| ILMN_1698179 | TAGLN3    | 117.0457375 | 135.9438625  |
| ILMN_2060212 | TBC1D24   | 207.3557    | 177.5095375  |
| ILMN_1684417 | TCP10     | 116.017325  | 127.3566875  |
| ILMN_1654370 | TESK2     | 260.956     | 211.586675   |
| ILMN_1709044 | TGIF2     | 849.6235125 | 684.7035625  |
| ILMN_1786847 | TGM3      | 142.4838125 | 128.0499875  |
| ILMN_1731048 | TLR1      | 109.31645   | 120.063875   |
| ILMN_2131336 | TMEM194   | 554.6959875 | 443.3712875  |
| ILMN_1651535 | TMEM217   | 176.7648875 | 158.2628875  |
| ILMN_1757129 | TMEM88    | 461.6483    | 349.762725   |
| ILMN_1736911 | TMOD1     | 118.1209875 | 146.09275    |
| ILMN_1725014 | TMPRSS6   | 119.4649375 | 138.757575   |
| ILMN_1719759 | TNC       | 155.7806875 | 132.505025   |
| ILMN_1731742 | TNFRSF13C | 150.5800375 | 129.009325   |
| ILMN_1743100 | TNFRSF18  | 976.6505125 | 2421.9859625 |

|              |          |              |              |
|--------------|----------|--------------|--------------|
| ILMN_2349633 | TNFRSF18 | 1403.1723375 | 1880.0266    |
| ILMN_2112256 | TNFRSF4  | 4820.958125  | 2140.585375  |
| ILMN_1710204 | TNFRSF4  | 928.6155     | 11140.3355   |
| ILMN_2363392 | TNFSF14  | 6222.198     | 3418.357625  |
| ILMN_1655414 | TNFSF14  | 5009.827     | 925.8603125  |
| ILMN_1661343 | TNFSF14  | 1333.8822    | 4339.690375  |
| ILMN_1746175 | TNFSF4   | 736.301225   | 1160.5597875 |
| ILMN_2089875 | TNFSF4   | 1816.267575  | 486.702625   |
| ILMN_1667893 | TNS3     | 135.718975   | 463.7592125  |
| ILMN_1749218 | TOPORS   | 255.1299375  | 223.7347     |
| ILMN_3305055 | TP63     | 124.4425125  | 166.3843875  |
| ILMN_1763104 | TRAF4    | 584.6709875  | 405.0281125  |
| ILMN_1684943 | TRAT1    | 1225.64015   | 1953.52375   |
| ILMN_1704972 | TRIM5    | 471.416      | 373.2538625  |
| ILMN_1775761 | TSR1     | 729.7345875  | 600.837725   |
| ILMN_2183784 | TTC12    | 121.8393125  | 140.4326625  |
| ILMN_1672908 | TWIST1   | 124.7775     | 164.7625375  |
| ILMN_1678841 | UBD      | 136.8637375  | 281.3033375  |
| ILMN_2241679 | UBE2D3   | 128.6821125  | 120.6864375  |
| ILMN_1654323 | UBE3A    | 125.92005    | 119.6828875  |
| ILMN_1750521 | UCP3     | 192.879025   | 160.4595875  |
| ILMN_1755992 | UCP3     | 162.0526375  | 139.98565    |
| ILMN_1718136 | UQCRHL   | 5041.99625   | 6014.628     |
| ILMN_1664537 | USP11    | 423.862175   | 300.6838625  |
| ILMN_1687284 | USP12    | 295.7662     | 248.72025    |
| ILMN_1714527 | VAMP3    | 790.535225   | 656.319525   |
| ILMN_1766955 | VCAM1    | 248.203375   | 157.6581875  |
| ILMN_2307903 | VCAM1    | 1032.0768125 | 125.8765     |
| ILMN_1683939 | VIPR2    | 114.8312     | 122.7872     |
| ILMN_1682996 | VWA5A    | 127.740025   | 139.0208125  |
| ILMN_1661051 | WBP11    | 132.4729875  | 119.724475   |
| ILMN_1685763 | WDR45L   | 572.16425    | 474.8373625  |
| ILMN_1718792 | XCL1     | 1053.031425  | 2945.11785   |
| ILMN_2224955 | XCL1     | 7781.824125  | 475.2202     |
| ILMN_1802160 | XIRP1    | 1142.5642875 | 443.936875   |
| ILMN_1705865 | XIRP2    | 107.4704125  | 114.8700875  |
| ILMN_1799815 | XYLT2    | 559.72925    | 766.5865625  |
| ILMN_1731113 | ZBTB43   | 515.8247     | 417.990675   |
| ILMN_1736954 | ZBTB7B   | 216.3696625  | 261.0252625  |
| ILMN_1754660 | ZCCHC24  | 202.094975   | 172.510925   |
| ILMN_1723007 | ZCCHC9   | 1226.031525  | 1408.7775    |
| ILMN_1715526 | ZDHHC21  | 120.4049125  | 131.6752875  |
| ILMN_3242993 | ZFR2     | 150.5525125  | 129.4174625  |
| ILMN_1793621 | ZFYVE27  | 133.7688125  | 149.7469125  |
| ILMN_1771627 | ZMIZ1    | 2444.37      | 1715.89925   |
| ILMN_1761965 | ZNF200   | 109.0708125  | 118.19205    |

|              |         |             |             |
|--------------|---------|-------------|-------------|
| ILMN_1709377 | ZNF28   | 137.0385    | 127.3357125 |
| ILMN_1700766 | ZNF324B | 192.3731    | 167.4530125 |
| ILMN_1692100 | ZNF35   | 149.69075   | 193.0296125 |
| ILMN_1673804 | ZNF426  | 238.8212    | 209.9627    |
| ILMN_1734267 | ZNF587  | 115.227025  | 125.4889125 |
| ILMN_1698048 | ZNF619  | 122.7989    | 115.8848875 |
| ILMN_1810891 | ZNF629  | 137.3506    | 125.0395125 |
| ILMN_1670640 | ZNF664  | 160.8478125 | 145.1453375 |
| ILMN_3251506 | ZNF69   | 129.4988625 | 141.7017625 |
| ILMN_1734608 | ZNF77   | 226.3165625 | 194.824775  |
| ILMN_1727574 | ZNF827  | 834.3250875 | 631.300625  |

---

ILMN\_GENE: Illumina Gene
