# Supplementary material for: Transcriptomic features of tumour-infiltrating CD4lowCD8high double positive αβ T cells in melanoma
Source: PubMed Central journal article supplement (PMC7125144; doi:10.1038/s41598-020-62664-x), 2020-04-03
Supplement: 41598_2020_62664_MOESM5_ESM.pdf [file 41598_2020_62664_MOESM5_ESM.pdf]

| <b>Probe</b> | <b>ILMN_GENE</b> | <b>mean expression in DP</b> | <b>mean expression in CD8</b> |
|--------------|------------------|------------------------------|-------------------------------|
| ILMN_1781999 | ABCF2            | 546.074475                   | 615.1121375                   |
| ILMN_1716832 | ACSF3            | 136.5403375                  | 150.4636875                   |
| ILMN_1679797 | ADARB1           | 1072.2222125                 | 732.5753875                   |
| ILMN_2319326 | ADARB1           | 280.3200375                  | 194.244675                    |
| ILMN_1657442 | ADARB1           | 242.670075                   | 216.37965                     |
| ILMN_1690829 | AGER             | 123.8017875                  | 116.653225                    |
| ILMN_1794875 | AGPAT9           | 4764.05225                   | 2805.052125                   |
| ILMN_1715532 | AKAP12           | 122.4227375                  | 111.9337375                   |
| ILMN_1670870 | ALCAM            | 310.5463125                  | 383.18335                     |
| ILMN_1796946 | ALLC             | 106.6048                     | 113.531425                    |
| ILMN_1660183 | ANKRD13D         | 116.9001375                  | 126.0616                      |
| ILMN_1655868 | ANP32C           | 188.4416625                  | 220.2140125                   |
| ILMN_1813840 | AOF2             | 619.5135                     | 728.5491875                   |
| ILMN_1731178 | ARHGAP28         | 112.3649875                  | 120.4621625                   |
| ILMN_1779256 | ARMC2            | 131.038575                   | 121.96495                     |
| ILMN_1700340 | ASGR2            | 118.5828125                  | 126.93515                     |
| ILMN_1700625 | ATP5S            | 285.204825                   | 334.397875                    |
| ILMN_2298301 | BNC1             | 115.8346875                  | 121.7465125                   |
| ILMN_2155172 | BRIX1            | 1144.0847125                 | 1394.63825                    |
| ILMN_1676548 | BZW2             | 2599.088125                  | 2989.535625                   |
| ILMN_1656463 | C11ORF73         | 203.3215125                  | 227.7316375                   |
| ILMN_2180371 | C12ORF24         | 666.7982125                  | 965.7316625                   |
| ILMN_1728435 | C12ORF45         | 475.3160375                  | 575.996125                    |
| ILMN_2173500 | C18ORF51         | 123.232875                   | 115.8632375                   |
| ILMN_1771815 | C20ORF43         | 6465.29825                   | 5285.283875                   |
| ILMN_2266005 | C21ORF51         | 314.6141125                  | 549.8450375                   |
| ILMN_2356311 | C21ORF51         | 481.1465625                  | 358.3193375                   |
| ILMN_1815682 | C3ORF37          | 1426.420375                  | 1150.630575                   |
| ILMN_1757137 | C4ORF38          | 113.34315                    | 107.371375                    |
| ILMN_1677292 | C5ORF30          | 250.756425                   | 312.601975                    |
| ILMN_1659524 | C6ORF66          | 678.481775                   | 835.82275                     |
| ILMN_2082699 | C8ORFK36         | 115.8299                     | 123.900925                    |
| ILMN_1804339 | CAMK1G           | 135.7508375                  | 122.712425                    |
| ILMN_2319544 | CAMK2D           | 154.9016625                  | 178.7578875                   |
| ILMN_1785156 | CASRL1           | 113.772025                   | 127.6523625                   |
| ILMN_1678061 | CASS4            | 248.3291625                  | 187.8225875                   |
| ILMN_1655191 | CASZ1            | 562.0506125                  | 724.583375                    |
| ILMN_1686920 | CCDC58           | 693.7295125                  | 878.5679875                   |
| ILMN_1745904 | CCDC6            | 1736.755125                  | 2429.603875                   |
| ILMN_1769129 | CCL19            | 122.6833125                  | 113.37725                     |
| ILMN_1692390 | CCNT1            | 338.5425625                  | 297.7871125                   |
| ILMN_1679382 | CCT2             | 3620.764125                  | 4376.7535                     |
| ILMN_3239639 | CD200R1L         | 120.1728                     | 111.4048                      |
| ILMN_1687825 | CD226            | 860.026625                   | 1098.373075                   |
| ILMN_1688959 | CD27             | 210.4026875                  | 610.514675                    |

|              |               |              |              |
|--------------|---------------|--------------|--------------|
| ILMN_1727284 | CD4           | 453.1392625  | 111.4364125  |
| ILMN_1659077 | CD40LG        | 6789.513125  | 2388.150375  |
| ILMN_1666074 | CD8B          | 113.485525   | 120.99925    |
| ILMN_1802615 | CDK6          | 4081.186625  | 5578.251875  |
| ILMN_1778917 | CDK7          | 1006.8672875 | 1169.066475  |
| ILMN_1727815 | CFI           | 148.1957875  | 164.354475   |
| ILMN_1732750 | CHCHD8        | 262.756375   | 294.0178375  |
| ILMN_1770548 | CLASP2        | 232.1587     | 204.9334625  |
| ILMN_1763398 | CLEC17A       | 187.2013875  | 164.8576     |
| ILMN_1670101 | CLEC2D        | 307.4464     | 428.4228875  |
| ILMN_1740502 | CLEC4GP1      | 108.310275   | 114.65485    |
| ILMN_2393994 | CSPP1         | 362.9260875  | 415.22065    |
| ILMN_1661359 | CXORF65       | 247.1049625  | 197.689      |
| ILMN_1744458 | CYP2W1        | 116.081875   | 109.11515    |
| ILMN_3255061 | CYTSB         | 121.6130125  | 113.307025   |
| ILMN_1730612 | DBNDD2        | 1049.2332    | 608.199825   |
| ILMN_1739640 | DCHS1         | 135.169875   | 124.5423625  |
| ILMN_1763129 | DCTPP1        | 2079.851     | 2649.812125  |
| ILMN_1726839 | DCUN1D5       | 2328.442875  | 2723.085625  |
| ILMN_1744308 | DHX33         | 866.9904375  | 1071.6525375 |
| ILMN_1741621 | DKFZP434I0714 | 132.3390875  | 121.8940875  |
| ILMN_1794692 | DNMT3B        | 258.708175   | 230.645675   |
| ILMN_1763162 | DPH2          | 252.5981     | 274.6418     |
| ILMN_1777917 | DSCR10        | 139.1086375  | 125.311025   |
| ILMN_1791711 | DUOXA2        | 125.026425   | 118.3780375  |
| ILMN_2275248 | ECE2          | 373.89455    | 450.3921375  |
| ILMN_1761463 | EFHD2         | 6730.18125   | 5123.408     |
| ILMN_1797074 | EMG1          | 1890.447     | 2287.20125   |
| ILMN_1677955 | ENTPD6        | 150.21065    | 140.623925   |
| ILMN_2166865 | ENY2          | 2846.65525   | 3249.53375   |
| ILMN_1756989 | EPHA8         | 143.85195    | 130.382925   |
| ILMN_2104696 | ERICH1        | 878.6670875  | 963.3490625  |
| ILMN_2055477 | EXOSC7        | 1027.3449375 | 1218.730625  |
| ILMN_1709233 | F5            | 122.0112375  | 150.8913125  |
| ILMN_2146761 | FABP5         | 2013.373375  | 2910.152625  |
| ILMN_1696302 | FABP5         | 295.708775   | 434.02885    |
| ILMN_3266606 | FABP5L2       | 4410.699     | 1527.6929125 |
| ILMN_3178258 | FABP5L2       | 1039.170875  | 5974.0455    |
| ILMN_3238845 | FAM165B       | 537.535925   | 653.450225   |
| ILMN_1655051 | FAM86B1       | 218.0040625  | 256.8875375  |
| ILMN_2062687 | FARP2         | 156.9063125  | 140.79445    |
| ILMN_1768743 | FIP1L1        | 752.1383     | 830.1787375  |
| ILMN_3185453 | FLJ10661      | 129.69735    | 141.3337875  |
| ILMN_1705550 | FOXD4L2       | 126.4570625  | 114.409775   |
| ILMN_1661566 | FSTL4         | 133.168675   | 122.438225   |
| ILMN_1744914 | FUCA2         | 236.0935125  | 180.620925   |

|              |           |              |              |
|--------------|-----------|--------------|--------------|
| ILMN_2280548 | FYB       | 106.771275   | 114.4816875  |
| ILMN_1709032 | FYCO1     | 896.0827875  | 720.16865    |
| ILMN_1679476 | GART      | 1592.47725   | 800.9108875  |
| ILMN_1793220 | GART      | 696.881025   | 1774.88      |
| ILMN_1797482 | GCDH      | 220.000775   | 522.9815875  |
| ILMN_2296843 | GCDH      | 414.4951125  | 264.2001     |
| ILMN_1707484 | GEMIN6    | 758.0822375  | 960.060925   |
| ILMN_1769388 | GJB2      | 135.3812125  | 171.9277875  |
| ILMN_2226223 | GJB6      | 120.7590125  | 140.119475   |
| ILMN_1718671 | GJB6      | 128.669275   | 157.1667375  |
| ILMN_1806754 | GLDC      | 282.2840375  | 854.8050875  |
| ILMN_1736757 | GNPTAB    | 991.5712875  | 1312.521     |
| ILMN_1730816 | GPR162    | 128.0344625  | 148.06015    |
| ILMN_1725271 | GPR3      | 156.189125   | 144.9764125  |
| ILMN_3242603 | GTF2H2B   | 516.9658375  | 576.6771375  |
| ILMN_1725666 | GTF2H3    | 291.780225   | 311.4122     |
| ILMN_1696330 | GUF1      | 251.9959875  | 285.6177625  |
| ILMN_1693826 | HAVCR2    | 4491.687875  | 6880.74625   |
| ILMN_1704089 | HPN       | 113.1919375  | 108.18683375 |
| ILMN_1863284 | HS,130916 | 544.1257     | 621.0486     |
| ILMN_1828747 | HS,147255 | 115.4578875  | 128.1549125  |
| ILMN_1849907 | HS,195035 | 129.98635    | 123.867375   |
| ILMN_1821915 | HS,353831 | 122.6687375  | 129.3806125  |
| ILMN_1862684 | HS,373429 | 637.4927625  | 933.234925   |
| ILMN_1819494 | HS,406106 | 256.384225   | 337.6049875  |
| ILMN_1868808 | HS,434799 | 115.369      | 158.696975   |
| ILMN_1821681 | HS,529324 | 131.876125   | 140.806975   |
| ILMN_1869823 | HS,543130 | 131.8411625  | 140.0752125  |
| ILMN_1888935 | HS,549668 | 123.1046625  | 134.2802625  |
| ILMN_1912197 | HS,567480 | 125.4754125  | 196.1495875  |
| ILMN_1855797 | HS,568093 | 154.2935875  | 171.9240625  |
| ILMN_1890362 | HS,570751 | 153.1664125  | 173.5394625  |
| ILMN_1848214 | HS,571599 | 129.5084875  | 139.4365875  |
| ILMN_1889135 | HS,572124 | 128.867075   | 121.7592125  |
| ILMN_1771921 | HSCB      | 219.6125875  | 246.690475   |
| ILMN_1803775 | HSPE1     | 2589.469375  | 3525.34025   |
| ILMN_1696654 | IFIT5     | 161.0033625  | 135.1091125  |
| ILMN_1774983 | IL17A     | 123.13565    | 134.1094375  |
| ILMN_1767523 | IL17RB    | 7183.2896875 | 3119.9035    |
| ILMN_2407799 | IL24      | 226.1770375  | 190.247825   |
| ILMN_1753758 | IL27      | 113.4241125  | 105.9127     |
| ILMN_1667575 | IL31RA    | 121.9088     | 115.419625   |
| ILMN_1669174 | IL4       | 10095.381    | 142.273325   |
| ILMN_2389080 | IL4       | 182.2643125  | 6093.39225   |
| ILMN_1727248 | INF2      | 338.36855    | 274.9224875  |
| ILMN_1660844 | INTS4     | 624.5129875  | 544.589775   |

|              |              |              |             |
|--------------|--------------|--------------|-------------|
| ILMN_1811468 | IRX3         | 5444.00175   | 2294.831375 |
| ILMN_1711650 | KCNE1L       | 152.3193125  | 134.67485   |
| ILMN_1780334 | KCNJ2        | 208.4257375  | 156.087925  |
| ILMN_1740508 | KCNMA1       | 114.5354     | 107.2019625 |
| ILMN_1693233 | KIAA0513     | 233.814625   | 179.1771125 |
| ILMN_1782222 | KIAA1033     | 122.301325   | 132.063275  |
| ILMN_1752273 | KIAA1143     | 495.5788875  | 598.1752625 |
| ILMN_1794528 | KIAA1751     | 125.129675   | 113.0530125 |
| ILMN_1772786 | KIF16B       | 129.6914     | 120.093075  |
| ILMN_1703314 | KLHL36       | 1296.943375  | 1104.496575 |
| ILMN_2189222 | KLHL8        | 580.86585    | 670.9714375 |
| ILMN_2384139 | KLRC1        | 117.1271     | 441.0732875 |
| ILMN_1752647 | KLRC1        | 128.5708125  | 313.0066    |
| ILMN_2384140 | KLRC1        | 131.9296875  | 224.6144375 |
| ILMN_2059357 | KLRC2        | 118.7008     | 240.3815875 |
| ILMN_2386790 | KLRC3        | 129.4593125  | 260.0630375 |
| ILMN_1797988 | KLRD1        | 366.7452875  | 792.1636625 |
| ILMN_1703949 | KPNB1        | 4285.9145    | 4829.42275  |
| ILMN_1794729 | KRT20        | 116.5591375  | 124.6523625 |
| ILMN_1813338 | LAG3         | 4900.2705375 | 8638.966625 |
| ILMN_2347888 | LARP4        | 488.35925    | 575.459325  |
| ILMN_1651328 | LAT1-3TM     | 246.4572125  | 309.507425  |
| ILMN_2377109 | LCK          | 653.97465    | 522.1208875 |
| ILMN_2412214 | LGALS9       | 175.9085875  | 143.1300625 |
| ILMN_1665011 | LHX3         | 111.4308875  | 123.8980375 |
| ILMN_1738725 | LIF          | 758.4126375  | 422.7844875 |
| ILMN_3262025 | LOC100127993 | 7251.109125  | 8085.7555   |
| ILMN_3268914 | LOC100128410 | 8273.6025    | 9901.028125 |
| ILMN_3188196 | LOC100128862 | 121.782425   | 132.9273125 |
| ILMN_3189463 | LOC100129054 | 113.7131875  | 121.4208    |
| ILMN_3188174 | LOC100129067 | 145.6984125  | 156.370825  |
| ILMN_3178544 | LOC100129436 | 113.7917625  | 120.5027875 |
| ILMN_3259185 | LOC100129630 | 144.6052125  | 131.9551375 |
| ILMN_3178320 | LOC100130288 | 117.2889625  | 127.0217625 |
| ILMN_3265391 | LOC100130413 | 148.6963125  | 140.39275   |
| ILMN_3258321 | LOC100130932 | 691.8457625  | 875.5185625 |
| ILMN_3215992 | LOC100131320 | 111.5887875  | 118.09085   |
| ILMN_3296811 | LOC100131416 | 114.0026625  | 121.5770875 |
| ILMN_3215392 | LOC100131514 | 112.5388625  | 120.5565625 |
| ILMN_3202653 | LOC100132493 | 208.477275   | 231.6728125 |
| ILMN_3203444 | LOC100132535 | 137.4880625  | 159.9787875 |
| ILMN_3275936 | LOC100133277 | 225.5982875  | 283.01955   |
| ILMN_3291287 | LOC100133284 | 118.87825    | 125.9745875 |
| ILMN_3203189 | LOC100133591 | 324.6024625  | 290.1535375 |
| ILMN_1677852 | LOC284232    | 116.5699     | 127.2694125 |
| ILMN_3204890 | LOC345041    | 188.594825   | 217.4819625 |

|              |           |              |              |
|--------------|-----------|--------------|--------------|
| ILMN_3218851 | LOC402116 | 114.2138875  | 122.639775   |
| ILMN_1706434 | LOC440359 | 546.1680875  | 826.024775   |
| ILMN_1655842 | LOC442597 | 178.046175   | 219.6740875  |
| ILMN_1676613 | LOC642597 | 111.6486375  | 121.764525   |
| ILMN_1688246 | LOC642852 | 613.3163125  | 485.405475   |
| ILMN_3210741 | LOC642956 | 1105.7627125 | 1604.8732875 |
| ILMN_1735758 | LOC643062 | 126.329925   | 117.343125   |
| ILMN_1657728 | LOC643831 | 163.5770125  | 186.59005    |
| ILMN_1723213 | LOC644916 | 112.081075   | 122.454625   |
| ILMN_1719111 | LOC645200 | 116.121575   | 108.5398125  |
| ILMN_1746634 | LOC645454 | 110.7037875  | 117.5292875  |
| ILMN_1666706 | LOC645676 | 232.858875   | 260.588525   |
| ILMN_1691405 | LOC645850 | 121.6853375  | 112.13425    |
| ILMN_1672624 | LOC646110 | 117.9216125  | 109.4688625  |
| ILMN_1667933 | LOC646428 | 110.8037125  | 118.440925   |
| ILMN_1696526 | LOC646448 | 109.22295    | 119.11       |
| ILMN_1780669 | LOC647513 | 121.6740125  | 111.4983125  |
| ILMN_1700880 | LOC648399 | 151.3563625  | 167.8322125  |
| ILMN_1694313 | LOC649139 | 124.432725   | 116.7930125  |
| ILMN_1654493 | LOC649169 | 262.3705375  | 311.6399     |
| ILMN_1683664 | LOC650369 | 3648.25325   | 4352.583375  |
| ILMN_1803231 | LOC650543 | 118.318025   | 128.9808875  |
| ILMN_1783156 | LOC650832 | 1724.120375  | 1321.6876    |
| ILMN_1772906 | LOC652086 | 122.8814     | 112.9976     |
| ILMN_1696397 | LOC652833 | 119.952625   | 129.193525   |
| ILMN_1683115 | LOC652843 | 119.4093125  | 132.443475   |
| ILMN_1749336 | LOC652848 | 124.2272125  | 116.578425   |
| ILMN_1764944 | LOC653562 | 127.01865    | 119.100825   |
| ILMN_3204117 | LOC728115 | 304.831975   | 360.045775   |
| ILMN_3285231 | LOC728148 | 119.3678625  | 142.7594     |
| ILMN_3301813 | LOC728470 | 134.4428125  | 122.0785     |
| ILMN_3304519 | LOC728576 | 18917.4025   | 20784.07875  |
| ILMN_3243807 | LOC728933 | 115.8670375  | 111.151175   |
| ILMN_3224126 | LOC729222 | 144.955925   | 126.9178875  |
| ILMN_3298549 | LOC729251 | 121.8936125  | 109.8609625  |
| ILMN_1651351 | LOC729444 | 112.678975   | 121.7796375  |
| ILMN_3228320 | LOC729590 | 119.12825    | 109.3235625  |
| ILMN_3226392 | LOC729608 | 2247.083     | 2626.1065    |
| ILMN_3304584 | LOC729739 | 121.32065    | 130.21095    |
| ILMN_3302484 | LOC729774 | 389.5021625  | 460.42975    |
| ILMN_3306482 | LOC730107 | 369.477025   | 494.9788625  |
| ILMN_1844813 | LOC731670 | 112.0030875  | 119.1547125  |
| ILMN_1723443 | LRP2      | 124.7256125  | 114.5224     |
| ILMN_2131756 | LRRC40    | 117.6986125  | 123.5685875  |
| ILMN_1792927 | LTBP3     | 122.8187875  | 115.9042125  |
| ILMN_1799871 | LTK       | 123.19545    | 113.1947     |

|              |          |             |              |
|--------------|----------|-------------|--------------|
| ILMN_1663131 | LYST     | 188.4673375 | 422.9119375  |
| ILMN_1680139 | MAFF     | 264.9656    | 194.6782625  |
| ILMN_1661417 | MAGED2   | 125.830025  | 138.3467125  |
| ILMN_1657478 | MAGEL2   | 366.9208125 | 268.0502     |
| ILMN_1759341 | MAN2B1   | 348.1433    | 298.0708125  |
| ILMN_1790534 | MAP2K3   | 2152.13025  | 1678.009     |
| ILMN_1714162 | MARLIN1  | 169.1195625 | 192.5519     |
| ILMN_1764082 | MBOAT1   | 429.9389    | 317.58695    |
| ILMN_1769264 | MCCC2    | 163.0164625 | 176.084225   |
| ILMN_3248910 | MIR155HG | 6132.694625 | 7647.618375  |
| ILMN_3310326 | MIR221   | 327.4981125 | 392.9595875  |
| ILMN_1796316 | MMP9     | 252.678125  | 170.112375   |
| ILMN_1794589 | MRGPRX2  | 126.2104625 | 116.7599625  |
| ILMN_2076658 | MRPL1    | 808.1583    | 950.4123125  |
| ILMN_2103720 | MRPL15   | 921.798475  | 1141.0150875 |
| ILMN_2348050 | MRPL21   | 1487.393    | 1758.15825   |
| ILMN_2230592 | MRPL3    | 133.84605   | 144.9250875  |
| ILMN_1661039 | MRPL30   | 151.4707875 | 166.88165    |
| ILMN_2356895 | MRPL42   | 568.2228875 | 689.8373     |
| ILMN_1804851 | MRPS17   | 2102.64225  | 2519.716875  |
| ILMN_1711414 | MRPS27   | 740.1130375 | 822.970375   |
| ILMN_2308849 | MYADM    | 6988.457875 | 4806.96075   |
| ILMN_1711894 | MYB      | 720.8530125 | 956.2975     |
| ILMN_1679891 | NAF1     | 225.6475625 | 269.8769625  |
| ILMN_1780291 | NFAT5    | 437.2167125 | 382.1605625  |
| ILMN_1717313 | NFKBIE   | 547.412375  | 442.083825   |
| ILMN_1719695 | NFKBIZ   | 2481.52     | 1879.632625  |
| ILMN_1697614 | NHP2L1   | 667.7166625 | 780.143825   |
| ILMN_1815086 | NINJ1    | 6671.591625 | 5561.010125  |
| ILMN_1713638 | NIPAL4   | 122.743125  | 134.3905875  |
| ILMN_1750052 | NOP14    | 844.1636625 | 1005.4336125 |
| ILMN_1748476 | NOP58    | 4749.766625 | 5868.03675   |
| ILMN_2410145 | NR4A1    | 158.034375  | 125.849225   |
| ILMN_2408566 | NR4A1    | 170.667975  | 136.190925   |
| ILMN_1774281 | NT5DC3   | 121.742125  | 130.958425   |
| ILMN_1658247 | OAS1     | 213.61135   | 173.3330875  |
| ILMN_1758129 | OR6F1    | 116.2108125 | 110.6707875  |
| ILMN_1773278 | OR8D4    | 115.1343    | 110.453625   |
| ILMN_1709091 | OXGR1    | 121.9367875 | 113.891775   |
| ILMN_1744713 | PARK7    | 7985.6615   | 9165.712125  |
| ILMN_1810100 | PBX3     | 336.6899125 | 263.970475   |
| ILMN_1665679 | PEX10    | 112.0400375 | 119.4223     |
| ILMN_1790533 | PHACTR2  | 746.6902    | 495.70225    |
| ILMN_1775901 | PHF5A    | 625.1172375 | 819.5880875  |
| ILMN_1666819 | PHLDB1   | 213.1802125 | 184.0668625  |
| ILMN_1758111 | PIBF1    | 166.3757625 | 187.82245    |

|              |          |              |              |
|--------------|----------|--------------|--------------|
| ILMN_1715273 | PICALM   | 2363.333     | 1817.9715    |
| ILMN_2182647 | PINX1    | 286.27205    | 321.66275    |
| ILMN_1790309 | PINX1    | 453.7997625  | 580.2410125  |
| ILMN_1735693 | PIWIL3   | 104.95841    | 114.1555375  |
| ILMN_1691508 | PLAUR    | 165.58435    | 137.2867     |
| ILMN_1785265 | PLS3     | 123.506625   | 161.944175   |
| ILMN_2041788 | PLS3     | 112.07755    | 206.866125   |
| ILMN_1689525 | PMAIP1   | 192.174875   | 217.4401125  |
| ILMN_2098446 | PMAIP1   | 516.162175   | 675.1203875  |
| ILMN_1756445 | PMF1     | 447.8152875  | 525.9251875  |
| ILMN_1768273 | POP1     | 426.451875   | 465.03065    |
| ILMN_1798459 | PPAN     | 987.6323     | 1168.0958875 |
| ILMN_2294784 | PRDM1    | 848.2657375  | 645.0980625  |
| ILMN_1797776 | PRSS23   | 155.6725625  | 199.26775    |
| ILMN_2344130 | PSMD4    | 1864.820875  | 2064.768625  |
| ILMN_1747023 | PTGIR    | 152.879      | 129.9924375  |
| ILMN_1721046 | PTMS     | 867.365525   | 1294.6846625 |
| ILMN_1769779 | PTP4A3   | 367.1384375  | 203.4652625  |
| ILMN_2359710 | PTP4A3   | 364.5910625  | 195.6415875  |
| ILMN_1779353 | PUS7     | 825.97105    | 985.7057125  |
| ILMN_2221006 | RAD21    | 1180.554225  | 1397.77595   |
| ILMN_1651902 | RASL11A  | 121.723175   | 134.26325    |
| ILMN_1740716 | RBM26    | 805.982025   | 914.11315    |
| ILMN_1793033 | RBM28    | 410.022925   | 453.1400625  |
| ILMN_2169383 | REG4     | 137.0624125  | 405.296475   |
| ILMN_1661002 | RFWD2    | 1089.929     | 941.3754125  |
| ILMN_1770733 | RIC8A    | 2163.802125  | 1529.873375  |
| ILMN_1687922 | RP9      | 764.3657625  | 924.3325     |
| ILMN_1664167 | RPF2     | 2653.64325   | 3124.493375  |
| ILMN_2399893 | RPS24    | 1236.1758625 | 1588.186325  |
| ILMN_3235477 | RRP1     | 431.53025    | 513.2409875  |
| ILMN_1689972 | RRP9     | 259.1259     | 298.97575    |
| ILMN_1756928 | RTN1     | 105.856275   | 114.362225   |
| ILMN_1687315 | RXRA     | 732.051575   | 349.614475   |
| ILMN_1810857 | S100A5   | 130.3487125  | 120.4697     |
| ILMN_2399208 | SCAMP3   | 217.55655    | 244.4213     |
| ILMN_1781656 | SCGB1D1  | 112.6163625  | 120.710975   |
| ILMN_2363591 | SDCBP    | 1767.809025  | 1236.3559    |
| ILMN_2277246 | SDCBP2   | 121.6141375  | 110.08915    |
| ILMN_1676067 | SEMA3G   | 107.0005     | 116.3046375  |
| ILMN_2233878 | SERF1B   | 320.703025   | 360.6852125  |
| ILMN_1744381 | SERPINE1 | 259.8637125  | 208.2204125  |
| ILMN_1720513 | SETBP1   | 185.0626375  | 262.0766     |
| ILMN_1751075 | SETD4    | 238.0386125  | 265.90105    |
| ILMN_1795976 | SFXN2    | 174.302375   | 235.8015125  |
| ILMN_3249594 | SGK196   | 125.7911     | 115.2136875  |

|              |          |              |             |
|--------------|----------|--------------|-------------|
| ILMN_1792933 | SLC10A6  | 118.5314125  | 111.7119375 |
| ILMN_1785405 | SLC17A9  | 147.213075   | 177.4708    |
| ILMN_1781231 | SLC25A38 | 567.520225   | 647.0346875 |
| ILMN_2258471 | SLC30A5  | 129.059475   | 146.4302125 |
| ILMN_1789001 | SLC35B2  | 700.04025    | 875.0830375 |
| ILMN_2330307 | SLC43A3  | 186.278825   | 314.3947125 |
| ILMN_1658407 | SLC43A3  | 234.9404375  | 441.550425  |
| ILMN_1655740 | SNAI2    | 119.277775   | 126.895825  |
| ILMN_1683273 | SNAPC5   | 195.2155125  | 221.3478625 |
| ILMN_1772845 | SNRNP35  | 357.5517     | 307.1135125 |
| ILMN_1736093 | SNX33    | 217.14715    | 175.9598875 |
| ILMN_1728714 | SSSCA1   | 355.6278625  | 428.1416875 |
| ILMN_1799600 | STARD8   | 208.2712875  | 161.2999625 |
| ILMN_1750912 | STXBP6   | 164.5014     | 137.08275   |
| ILMN_2059549 | SYK      | 113.10155    | 107.2457875 |
| ILMN_1764087 | SYPL1    | 940.255825   | 673.886425  |
| ILMN_1787081 | TADA2A   | 202.1870875  | 220.0502    |
| ILMN_1771949 | TAF4B    | 135.588475   | 145.927525  |
| ILMN_2292387 | TANK     | 278.7298875  | 328.0089875 |
| ILMN_1688098 | TBC1D4   | 380.8013     | 723.6355875 |
| ILMN_1744795 | TBL1X    | 3286.946375  | 2130.645    |
| ILMN_1706839 | TCERG1   | 422.9682625  | 498.3699375 |
| ILMN_1684417 | TCP10    | 116.017325   | 127.27535   |
| ILMN_1653529 | TEX10    | 446.959525   | 550.1304625 |
| ILMN_1814657 | TFAP4    | 150.4829125  | 166.679375  |
| ILMN_2067708 | TFB2M    | 2262.335875  | 2714.500125 |
| ILMN_1782688 | THNSL1   | 142.5418     | 165.6422875 |
| ILMN_1750678 | TIMD4    | 187.3600625  | 416.20185   |
| ILMN_1706419 | TM6SF2   | 121.235525   | 128.7928125 |
| ILMN_1794677 | TMC6     | 1605.748375  | 1244.835875 |
| ILMN_1667716 | TMEM101  | 604.2959     | 690.9420125 |
| ILMN_1756238 | TMEM217  | 356.92925    | 289.1355875 |
| ILMN_1728202 | TMEM22   | 284.3303125  | 219.1552625 |
| ILMN_2394523 | TMEM231  | 123.991725   | 132.543975  |
| ILMN_2414325 | TNFAIP8  | 1783.823875  | 2260.349    |
| ILMN_2349633 | TNFRSF18 | 1403.1723375 | 853.9839125 |
| ILMN_1746175 | TNFSF4   | 736.301225   | 2623.86475  |
| ILMN_2089875 | TNFSF4   | 1816.267575  | 1032.89775  |
| ILMN_1761778 | TNFSF8   | 1546.5949    | 846.279175  |
| ILMN_1707591 | TNIP3    | 1602.787375  | 2622.035625 |
| ILMN_1667893 | TNS3     | 135.718975   | 488.2152125 |
| ILMN_1704576 | TP53AIP1 | 112.4059125  | 124.3733375 |
| ILMN_2094718 | TPT1     | 24526.41125  | 23076.54    |
| ILMN_1694817 | TRH      | 106.924125   | 113.8623875 |
| ILMN_1680993 | TRIM10   | 115.478625   | 123.036175  |
| ILMN_1764098 | TRNT1    | 150.3962375  | 164.09565   |



|              |         |              |              |
|--------------|---------|--------------|--------------|
| ILMN_1655924 | TRNT1   | 367.7509125  | 428.420925   |
| ILMN_1746393 | TSEN2   | 557.285575   | 653.3695875  |
| ILMN_1663113 | TTLL12  | 510.09385    | 654.2704375  |
| ILMN_1746846 | TTLL4   | 218.4945875  | 235.8945125  |
| ILMN_1653712 | UAP1L1  | 144.5518875  | 164.5055125  |
| ILMN_1768662 | UCK2    | 650.4554625  | 761.9075625  |
| ILMN_1714527 | VAMP3   | 790.535225   | 609.5617625  |
| ILMN_2325763 | VCAM1   | 160.5983625  | 1988.1085875 |
| ILMN_1766955 | VCAM1   | 248.203375   | 434.775025   |
| ILMN_2307903 | VCAM1   | 1032.0768125 | 218.4731     |
| ILMN_2045729 | WDR12   | 1403.638125  | 1663.542625  |
| ILMN_1789775 | WDR74   | 1141.6463625 | 1389.660975  |
| ILMN_3235472 | WDYHV1  | 246.1613     | 277.7600375  |
| ILMN_1706612 | WFDC2   | 110.3114875  | 119.6734375  |
| ILMN_1679881 | WRN     | 539.57475    | 610.6687125  |
| ILMN_1759495 | XPO5    | 731.441975   | 869.2970375  |
| ILMN_1732981 | ZBTB32  | 1407.80255   | 2495.999375  |
| ILMN_2075847 | ZC3H10  | 222.8152125  | 239.18845    |
| ILMN_1793621 | ZFYVE27 | 133.7688125  | 145.214075   |
| ILMN_1775138 | ZIM2    | 199.0836375  | 170.2409875  |
| ILMN_1695847 | ZKSCAN5 | 173.8131375  | 156.6375     |
| ILMN_1798533 | ZNF22   | 877.6591625  | 1251.410125  |
| ILMN_2061310 | ZNF280C | 270.4831125  | 320.3470875  |
| ILMN_1710873 | ZNF330  | 629.372475   | 737.9168375  |
| ILMN_1786722 | ZNF385A | 124.9977     | 115.936725   |
| ILMN_1670640 | ZNF664  | 160.8478125  | 148.164675   |
| ILMN_1738124 | ZNF772  | 134.234675   | 120.667075   |
| ILMN_1812478 | ZNHIT3  | 3086.460625  | 576.872825   |
| ILMN_1750044 | ZNHIT3  | 471.37625    | 3618.8195    |
| ILMN_1675377 | ZSCAN2  | 186.749125   | 203.0078625  |
| ILMN_1653163 | ZSCAN2  | 176.8938875  | 201.4655875  |

---

ILMN\_GENE: Illumina Gene
