# Supplementary material for: Transcriptomic features of tumour-infiltrating CD4lowCD8high double positive αβ T cells in melanoma
Source: PubMed Central journal article supplement (PMC7125144; doi:10.1038/s41598-020-62664-x), 2020-04-03
Supplement: 41598_2020_62664_MOESM6_ESM.pdf [file 41598_2020_62664_MOESM6_ESM.pdf]

| <b>Gene</b>               | <b>Forward</b>       | <b>Reverse</b>         |
|---------------------------|----------------------|------------------------|
| <i>CTNNB1 (b-catenin)</i> | AGGTCTGAGGAGCAGCTTCA | TTCAAATACCCTCAGGGGAACA |
| <i>LEF1</i>               | GACCTAATGCACGTGAAGCC | CACTCAGCAACGACATTTCGC  |
| <i>TCF1</i>               | CCCCGCTGCACAAGG      | CAGAGGCCTGTGAACTTGCT   |
| <i>thPOK</i>              | CCCTGTCTGCCACAAGATCA | CAGCTTGTTCGTTCTGTTGA   |
| <i>RUNX3</i>              | CCCCCTGAAGGGCTGAAAAT | CTGGCCACCTGGTTCTTCAT   |
| <i>TBX21 (T-bet)</i>      |                      | PPH00396A-200 (Qiagen) |
| <i>EOMES</i>              |                      | PPH12647A-200 (Qiagen) |
